# Supplementary material for: Subunit Vaccine Targeting Phosphate ABC Transporter ATP-Binding Protein, PstB, Provides Cross-Protection against Streptococcus suis Serotype 2, 7, and 9 in Mice
Source: MDPI journal article supplement (doi:10.3390/vetsci10010048), 2023-01-09

**Figure S1 Bioinformatic analysis of PstB**

**(A) Hydrophobicity analysis.** The hydrophobicity analysis was performed using software ProtScale (<https://web.expasy.org/protscale/>).

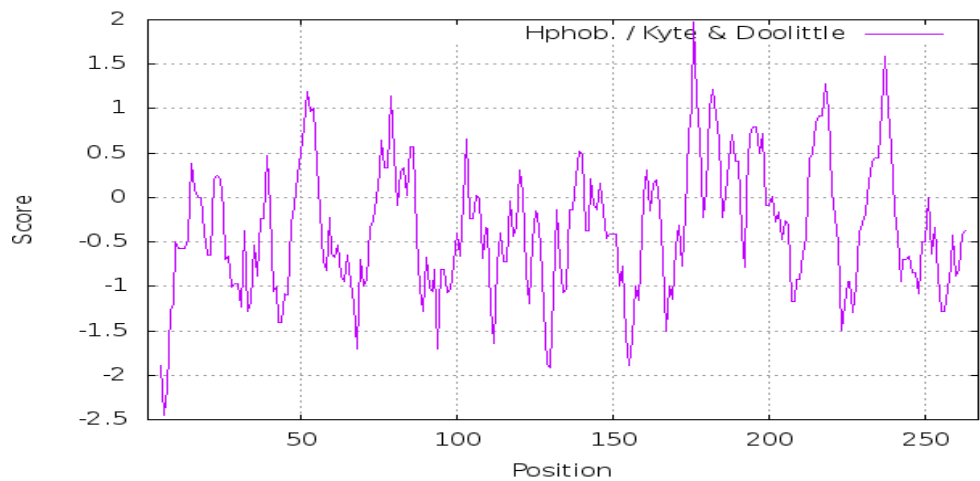

**(B) Transmembrane domain analysis.** The transmembrane domain was analyzed using the software TMHMM (<http://www.cbs.dtu.dk/services/TMHMM/>).

```
# WEBSEQUENCE Length: 267
# WEBSEQUENCE Number of predicted TMHs: 0
# WEBSEQUENCE Exp number of AAs in TMHs: 0.00635
# WEBSEQUENCE Exp number, first 60 AAs: 0.00262
# WEBSEQUENCE Total prob of N-in: 0.15608
WEBSEQUENCE TMHMM2.0 outside 1 267
```

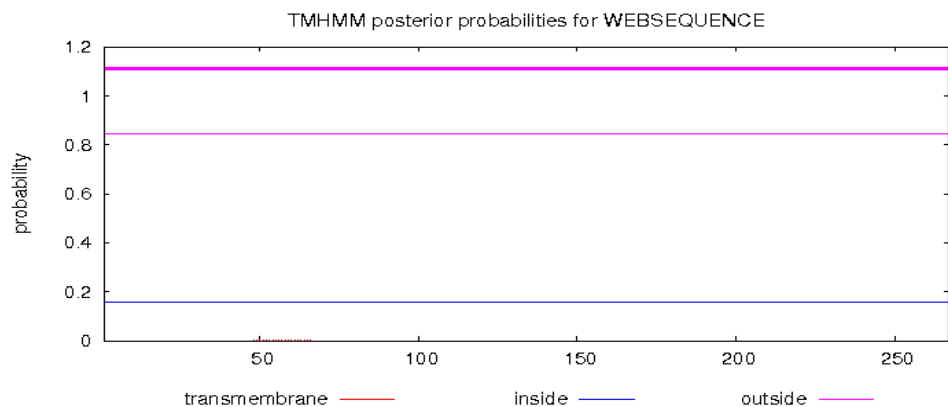

**(C) Antigenicity analysis.** The antigenicity was analyzed using Protean software of DNASTar package.

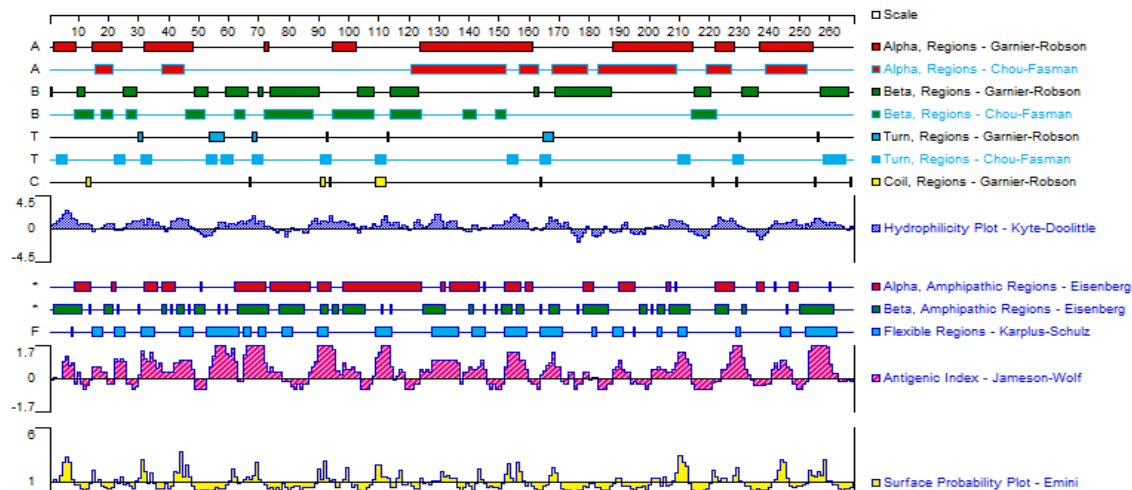

Supplement: s1 [file s1]
